# Supplementary material
Source: Springer Nature journal article supplement (https://www.springermedizin.de/resource/supplementary/13034_2013_261_MOESM1_ESM.pdf/9652660)

# Measurement (CFA) Model

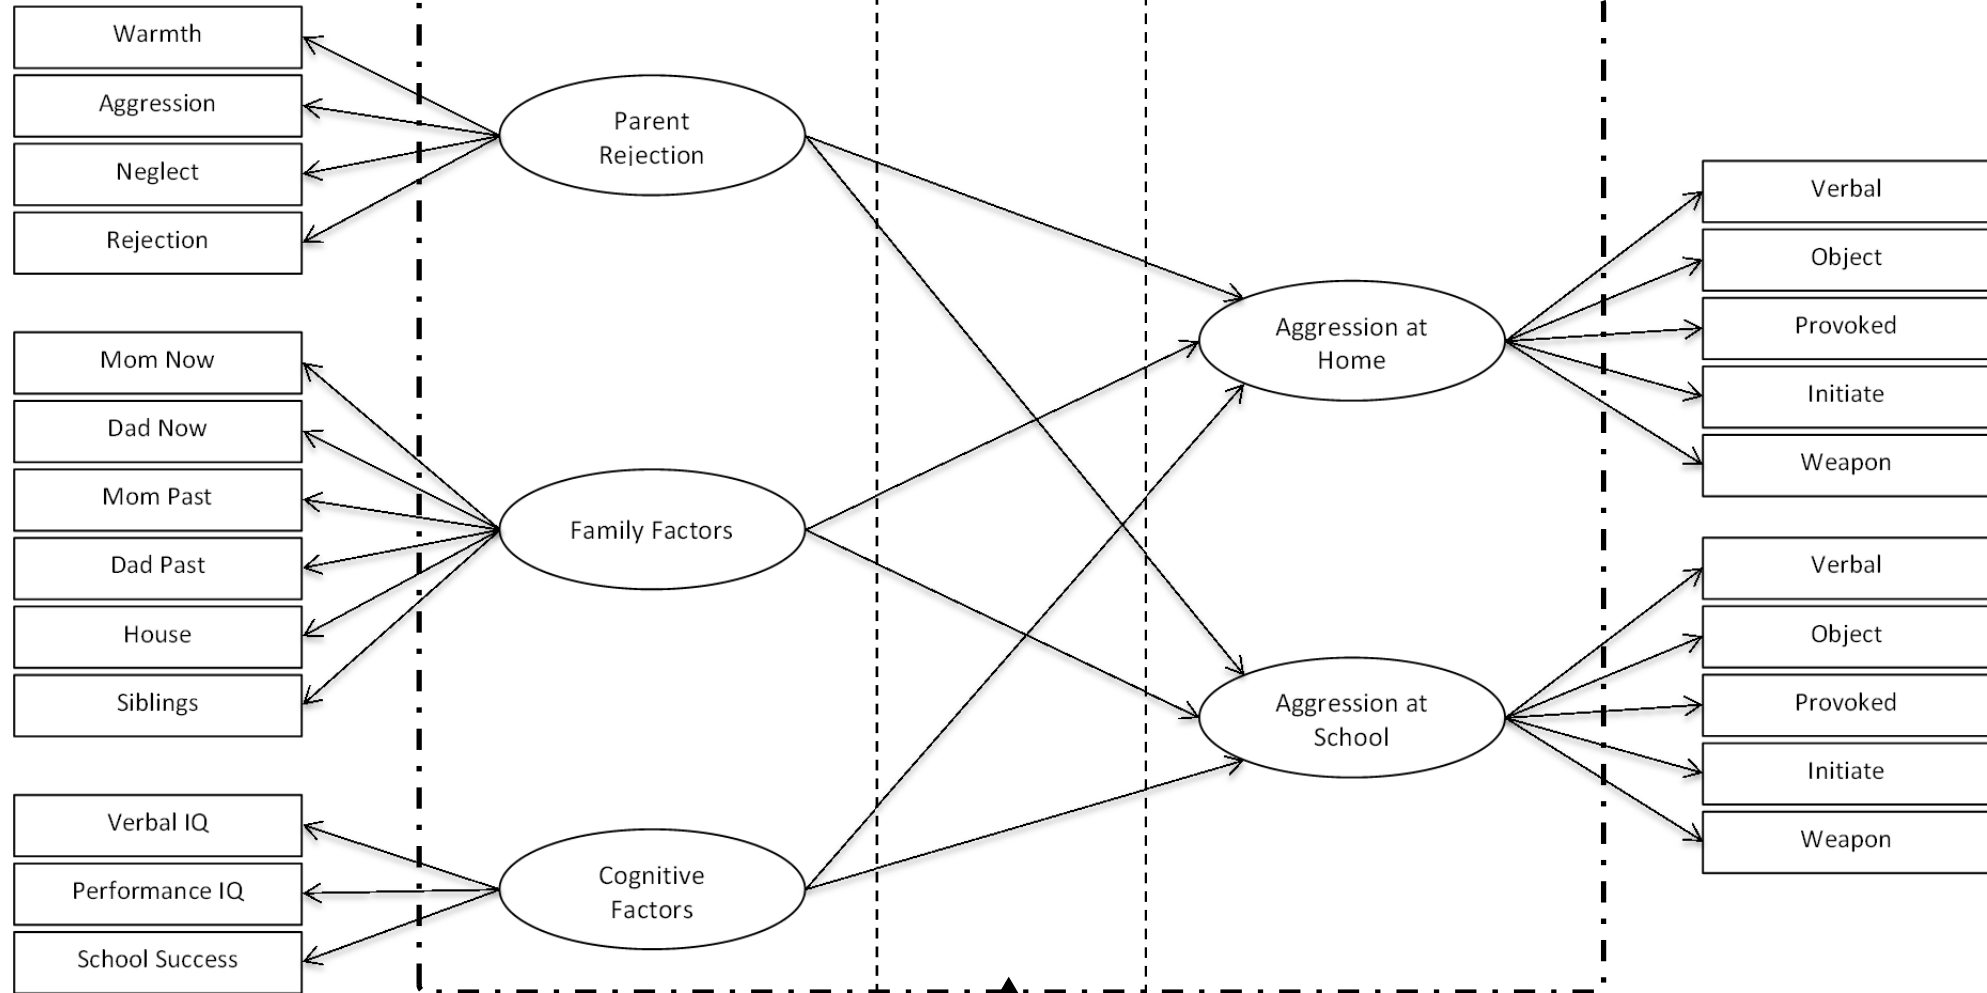

# Structural Model

Supplement: MOESM1 [file 9652660]
